# Supplementary material
Source: Springer Nature journal article supplement (https://www.springermedizin.de/resource/supplementary/12935_2011_329_MOESM3_ESM.pdf/9540410)

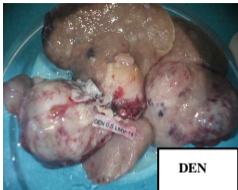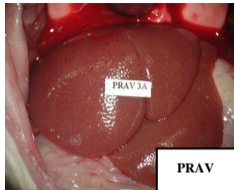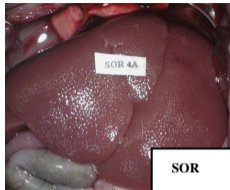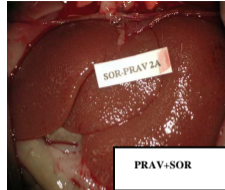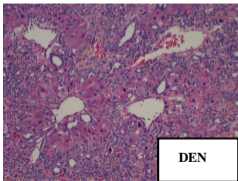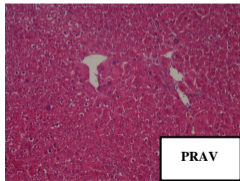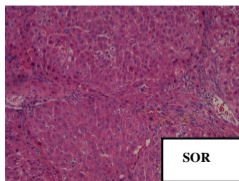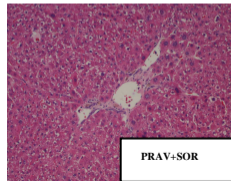

Supplement: MOESM3 [file 9540410]
